# Supplementary material
Source: PubMed Central journal article supplement (PMC5096994)
Supplement: NIHMS817887-supplement-Supp_Appendix.pdf [file NIHMS817887-supplement-Supp_Appendix.pdf]

**Appendix for “A Simple Bayesian Design to Identify Maximum  
Tolerated Dose Contour for Drug Combination Trials” by  
Liangcai Zhang and Ying Yuan**

Table S1: Total average number of patients at each dose combination under the PIPE and the phase I waterfall designs. Note that the number of patients treated at the true MTDs are showed in boldface.

| Sc. | Drug A | Drug B      |            |            |            |   |             |            |            |            |   | Total Number of patients |
|-----|--------|-------------|------------|------------|------------|---|-------------|------------|------------|------------|---|--------------------------|
|     |        | Waterfall   |            |            |            |   | PIPE        |            |            |            |   |                          |
|     |        | 1           | 2          | 3          | 4          | 5 | 1           | 2          | 3          | 4          | 5 |                          |
| 1   | 2      | 5.4         | <b>6.6</b> | 2.5        |            |   | 5.4         | <b>6.2</b> | 1.6        |            |   | 27                       |
|     | 1      | 3.4         | 1.7        | <b>7.2</b> |            |   | 3.1         | 4.0        | <b>6.8</b> |            |   |                          |
| 2   | 2      | <b>7.5</b>  | 3.2        | 0.4        |            |   | <b>8.0</b>  | 1.3        | 0.0        |            |   | 27                       |
|     | 1      | 6.2         | <b>5.0</b> | 2.7        |            |   | 6.5         | <b>8.0</b> | 3.2        |            |   |                          |
| 3   | 2      | <b>7.8</b>  | 2.9        | 0.4        |            |   | <b>7.9</b>  | 2.2        | 0.2        |            |   | 27                       |
|     | 1      | 6.4         | 3.8        | <b>4.6</b> |            |   | 4.4         | 6.4        | <b>6.0</b> |            |   |                          |
| 4   | 2      | 4.4         | 1.0        | 0.1        |            |   | 3.3         | 0.1        | 0.0        |            |   | 18                       |
|     | 1      | <b>8.3</b>  | 2.5        | 0.8        |            |   | <b>10.7</b> | 3.4        | 0.6        |            |   |                          |
| 5   | 4      | 3.8         | 0.4        | 0.0        | 0.0        |   | 6.1         | 1.1        | 0.1        | 0.0        |   | 48                       |
|     | 3      | <b>9.7</b>  | 2.2        | 0.4        | 0.1        |   | <b>5.7</b>  | 4.8        | 1.1        | 0.1        |   |                          |
|     | 2      | 6.8         | <b>5.8</b> | 3.2        | 0.5        |   | 1.1         | <b>6.0</b> | 4.6        | 1.0        |   |                          |
|     | 1      | 3.8         | 1.7        | <b>5.4</b> | 3.6        |   | 3.1         | 1.1        | <b>6.2</b> | 6.0        |   |                          |
| 6   | 4      | <b>9.5</b>  | 3.1        | 0.3        | 0.0        |   | <b>8.5</b>  | 4.2        | 0.5        | 0.0        |   | 60                       |
|     | 3      | 6.9         | <b>6.8</b> | 2.6        | 0.2        |   | 2.6         | <b>7.7</b> | 5.4        | 0.5        |   |                          |
|     | 2      | 3.9         | 1.6        | <b>6.1</b> | 3.1        |   | 0.0         | 4.2        | <b>7.8</b> | 4.9        |   |                          |
|     | 1      | 3.1         | 0.1        | 2.0        | <b>8.8</b> |   | 3.0         | 0.0        | 2.0        | <b>8.8</b> |   |                          |
| 7   | 4      | 0.7         | 0.1        | 0.0        | 0.0        |   | 2.2         | 0.2        | 0.0        | 0.0        |   | 36                       |
|     | 3      | 4.4         | 0.1        | 0.0        | 0.0        |   | 5.1         | 1.2        | 0.1        | 0.0        |   |                          |
|     | 2      | <b>10.3</b> | 2.2        | 0.4        | 0.0        |   | <b>5.1</b>  | 4.4        | 1.2        | 0.1        |   |                          |
|     | 1      | 6.1         | <b>6.4</b> | 3.4        | 0.5        |   | 3.8         | <b>4.8</b> | 5.3        | 2.6        |   |                          |
| 8   | 4      | 0.9         | 0.1        | 0.0        | 0.0        |   | 2.4         | 0.2        | 0.0        | 0.0        |   | 36                       |
|     | 3      | 4.7         | 0.2        | 0.0        | 0.0        |   | 4.7         | 1.3        | 0.2        | 0.0        |   |                          |
|     | 2      | <b>10.2</b> | 2.4        | 0.4        | 0.0        |   | <b>4.2</b>  | 4.6        | 2.5        | 1.0        |   |                          |
|     | 1      | 5.8         | 2.8        | 4.4        | <b>3.8</b> |   | 3.0         | 1.9        | 3.9        | <b>6.3</b> |   |                          |

Table S1 continues.

|    |   |             |            |            |            |             |            |            |            |            |            |    |
|----|---|-------------|------------|------------|------------|-------------|------------|------------|------------|------------|------------|----|
| 9  | 3 | 4.0         | 6.2        | <b>8.3</b> | 3.4        | 0.5         | 0.4        | 6.0        | <b>9.7</b> | 5.3        | 0.8        | 60 |
|    | 2 | 3.3         | 0.2        | 3.3        | <b>8.7</b> | 4.7         | 0.0        | 3.1        | 3.9        | <b>8.9</b> | 4.9        |    |
|    | 1 | 3.1         | 0.0        | 0.3        | 3.8        | <b>10.6</b> | 3.0        | 0.0        | 0.1        | 4.1        | <b>9.8</b> |    |
| 10 | 3 | 6.6         | <b>9.2</b> | 3.9        | 0.6        | 0.0         | 5.5        | <b>8.6</b> | 5.1        | 1.0        | 0.1        | 60 |
|    | 2 | 3.9         | 2.8        | <b>8.8</b> | 4.7        | 0.6         | 0.0        | 4.6        | <b>7.8</b> | 6.6        | 1.8        |    |
|    | 1 | 3.1         | 0.0        | 0.8        | 5.6        | <b>9.9</b>  | 3.0        | 0.0        | 0.5        | 5.8        | <b>9.6</b> |    |
| 11 | 3 | <b>10.2</b> | 5.1        | 0.6        | 0.1        | 0.0         | <b>8.3</b> | 7.1        | 2.4        | 0.2        | 0.0        | 60 |
|    | 2 | 5.8         | 5.6        | <b>8.2</b> | 3.1        | 0.4         | 0.2        | 5.7        | <b>8.2</b> | 6.4        | 2.0        |    |
|    | 1 | 3.2         | 0.1        | 1.0        | 5.6        | <b>9.7</b>  | 3.0        | 0.0        | 1.8        | 5.4        | <b>9.3</b> |    |
| 12 | 3 | 4.6         | 0.9        | 0.2        | 0.0        | 0.0         | 4.9        | 1.4        | 0.2        | 0.0        | 0.0        | 42 |
|    | 2 | <b>10.2</b> | 3.0        | 0.9        | 0.1        | 0.0         | <b>6.3</b> | 4.6        | 2.2        | 0.4        | 0.1        |    |
|    | 1 | 5.8         | 4.4        | <b>7.7</b> | 3.7        | 0.7         | 3.0        | 4.4        | <b>6.8</b> | 5.1        | 2.6        |    |
| 13 | 3 | 4.3         | 0.7        | 0.0        | 0.0        | 0.0         | 5.0        | 1.1        | 0.2        | 0.0        | 0.0        | 42 |
|    | 2 | <b>10.6</b> | 2.6        | 0.6        | 0.1        | 0.0         | <b>6.1</b> | 4.7        | 2.6        | 0.7        | 0.1        |    |
|    | 1 | 5.7         | 2.9        | 5.7        | <b>5.8</b> | 2.5         | 3.0        | 2.8        | 4.5        | <b>6.0</b> | 5.2        |    |
| 14 | 3 | 4.4         | 0.6        | 0.0        | 0.0        | 0.0         | 5.5        | 1.0        | 0.1        | 0.0        | 0.0        | 39 |
|    | 2 | <b>10.1</b> | 2.6        | 0.7        | 0.1        | 0.0         | <b>6.9</b> | 4.0        | 1.1        | 0.2        | 0.0        |    |
|    | 1 | 6.5         | <b>7.9</b> | 4.7        | 0.8        | 0.0         | 4.3        | <b>6.4</b> | 5.8        | 2.8        | 1.0        |    |
